# Supplementary material
Source: PubMed Central journal article supplement (PMC4186807)
Supplement: Supp_Data.pdf [file Supp_Data.pdf]

## Supplementary Data

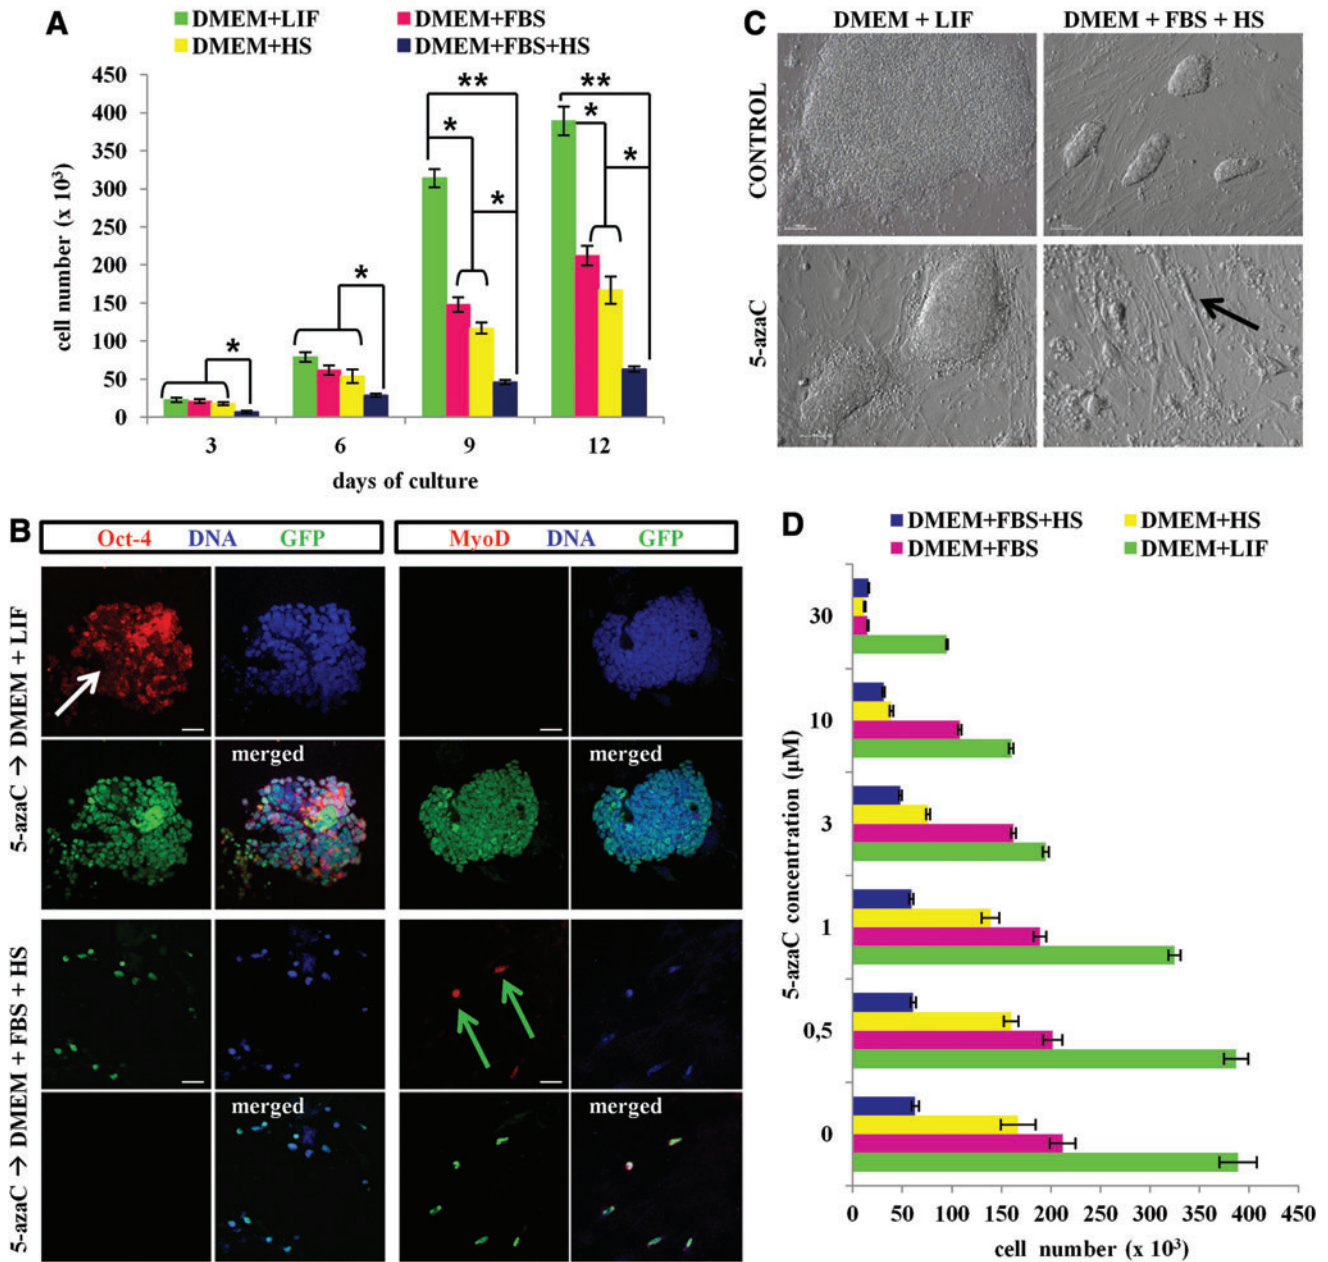

**SUPPLEMENTARY FIG. S1.** Behavior of embryonic stem (ES)-green fluorescent protein (GFP) cells in different culture conditions. (A) Number of ES-GFP cells after 3, 6, 9, and 12 days of culture in different media; \* $P < 0.05$ ; \*\* $P < 0.01$ . Three independent experiments were performed. (B) Immunofluorescent detection of Oct-4 and MyoD in ES-GFP cells pretreated with 10  $\mu\text{M}$  5-azaC and then cultured in DMEM+LIF or DMEM+FBS+HS for 12 days. White arrow indicates cells devoid of pluripotency marker Oct-4; green arrows indicate nuclei positive for MyoD. Scale bar, 20  $\mu\text{m}$ . (C) Morphology of ES-GFP cell colonies pretreated with 5-azaC and then cultured in DMEM+LIF or DMEM+FBS+HS for 12 days. In control cultures, incubation with 5-azaC was omitted. Black arrow indicates one of the elongated cells observed among ES cells treated with 5-azaC and cultured in DMEM+FBS+HS (or DMEM+HS). Scale bar, 100  $\mu\text{m}$ . (D) The number of ES-GFP cells pretreated with different concentrations of 5-azaC and then cultured in different types of media for 12 days. Three independent experiments were performed.

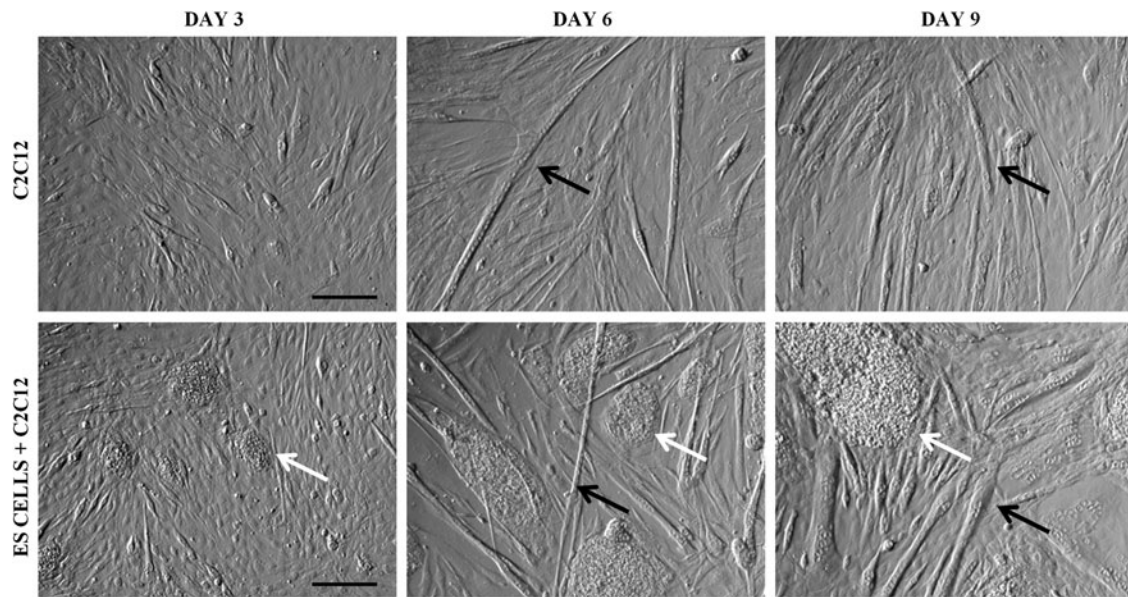

**SUPPLEMENTARY FIG. S2.** Co-culture of ES cells and myoblasts. Morphology of ES-GFP cells and C2C12 myoblasts after 3, 6, and 9 days of co-culture (*lower row*). *White arrows* indicate ES cells colonies; *black arrows* indicate myotubes. A control myoblast culture is shown in the *upper row*. Scale bar, 100  $\mu\text{m}$ .

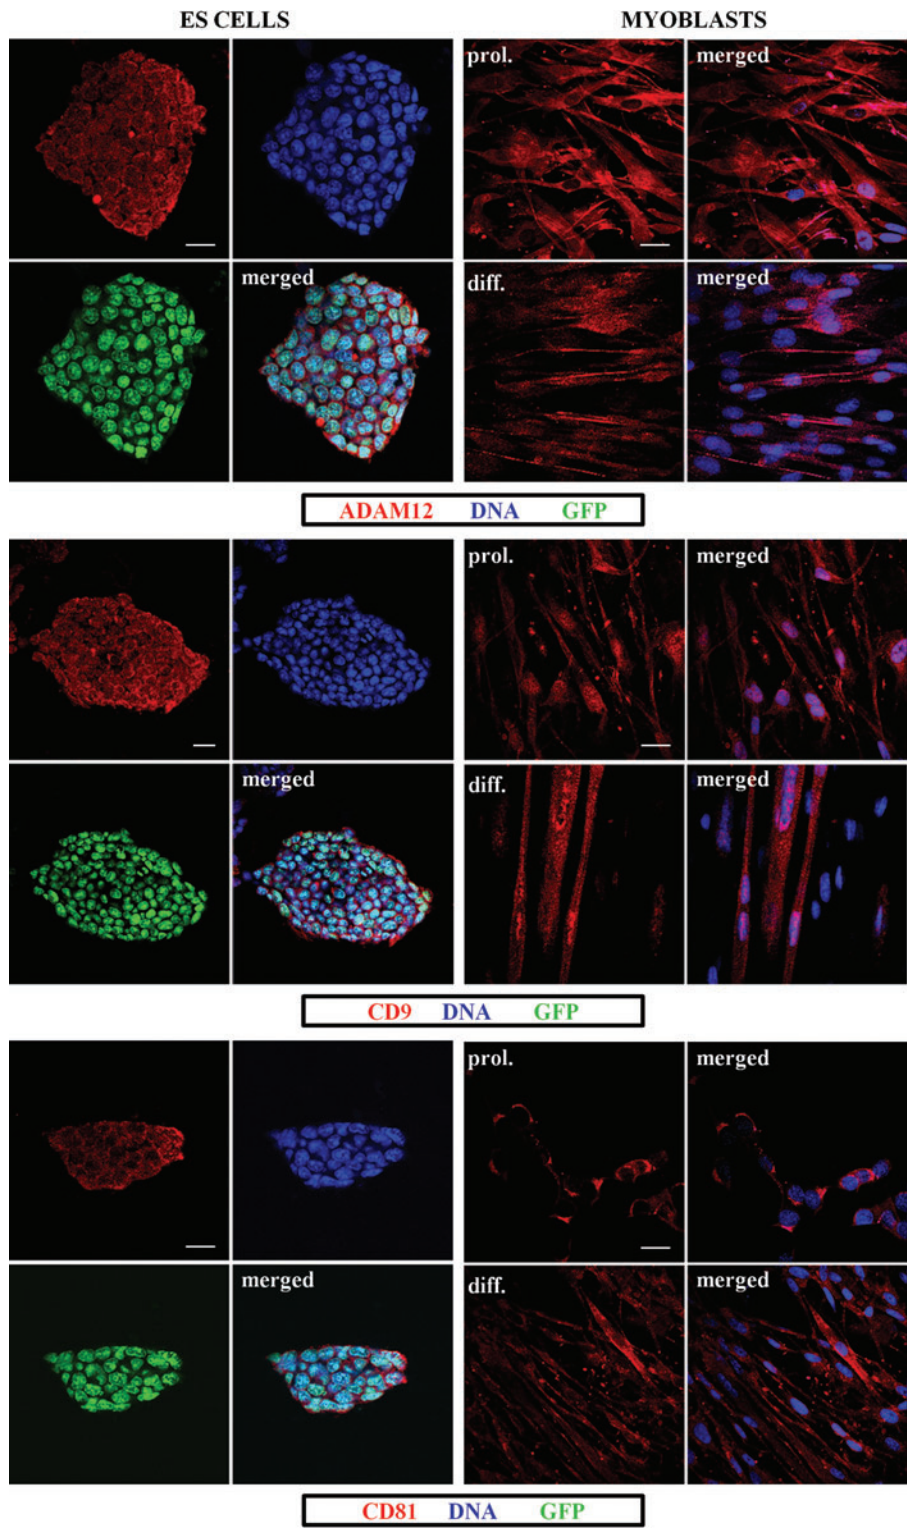

**SUPPLEMENTARY FIG. S3.** Immunolocalization of ADAM12, CD9, and CD81 in ES-GFP cells and myoblasts. “prol.” indicates images showing localization of analyzed proteins in proliferating C2C12 or SC-derived myoblasts; “diff.” indicates images showing presence of proteins in differentiating myoblasts. Scale bar, 20  $\mu$ m.

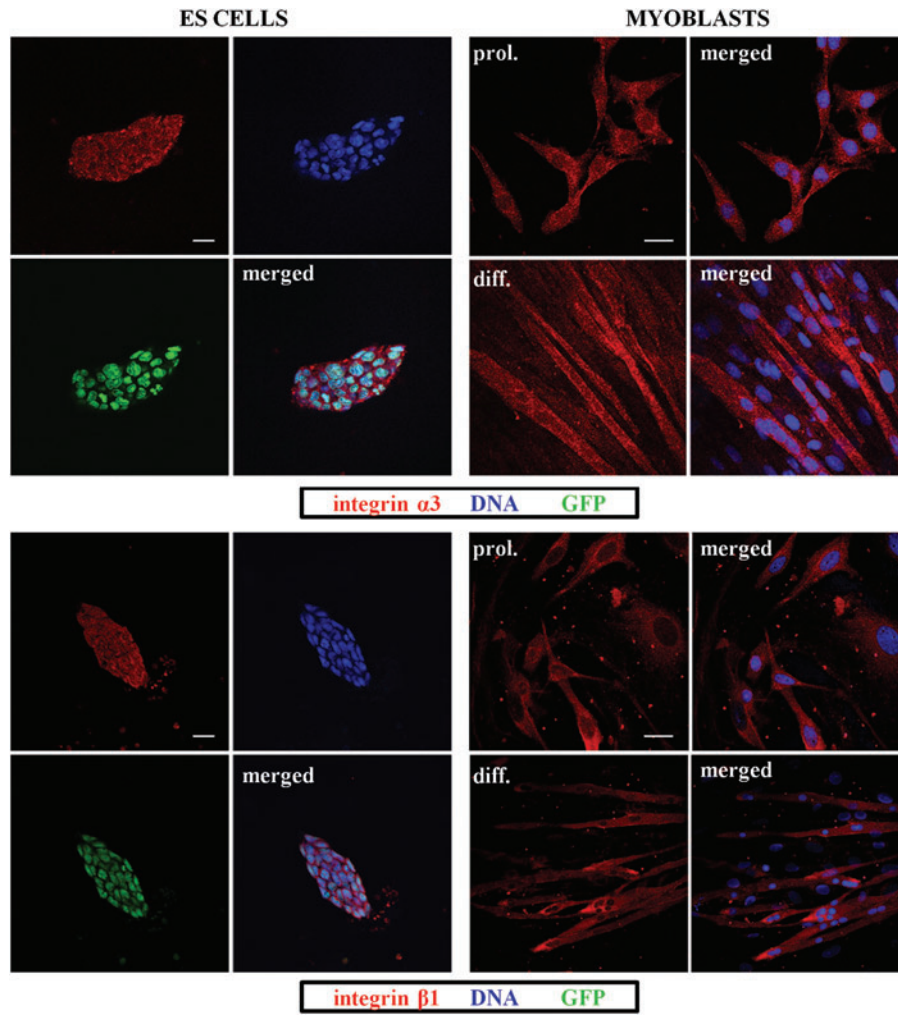

**SUPPLEMENTARY FIG. S4.** Immunolocalization of integrin  $\alpha$ 3 and  $\beta$ 1 in ES-GFP cells and myoblasts. “prol.,” marks images showing localization of analyzed proteins in proliferating C2C12 or SC-derived myoblasts; “diff.,” indicates images showing presence of proteins in differentiating myoblasts. Scale bar, 20  $\mu$ m.

SUPPLEMENTARY TABLE S1. PRIMERS USED IN REVERSE TRANSCRIPTION-POLYMERASE CHAIN REACTION

| <i>Gene</i>   | <i>Sequence</i>                 | <i>Product size (bp)</i> | <i>Annealing temperature (°C)</i> | <i>References</i> |
|---------------|---------------------------------|--------------------------|-----------------------------------|-------------------|
| <i>Oct-4</i>  | 5' GAAGTTGGAGAAGGTGGAACC 3'     | 450                      | 55                                | 1                 |
|               | 5' AACCATCCTTCTCTAGCCC 3'       |                          |                                   |                   |
|               | 5' GCGTTCCTTTGGAAAGGTGTT 3'     | 312                      | 55                                | 2                 |
|               | 5' CTCGAACCACATCCTTCTCT 3'      |                          |                                   |                   |
| <i>Nanog</i>  | 5' AGGGTCTGCTACTGAGATGCTCTG 3'  | 363                      | 59                                | 3                 |
|               | 5' CAACCACTGGTTTTTCTGCCACCG 3'  |                          |                                   |                   |
|               | 5' CAGGTGTTTGAGGGTAGCTC 3'      | 222                      | 52                                | 4                 |
|               | 5' CGGTTCATCATGGTACAGTC 3'      |                          |                                   |                   |
| <i>Sox2</i>   | 5' GGCGGCAACCAGAAGAACAG 3'      | 414                      | 55                                | 5                 |
|               | 5' GTTGCTCCAGCCGTTTCATGTG 3'    |                          |                                   |                   |
| <i>Pax3</i>   | 5' GCTGTCTGTGATCGGAACACT 3'     | 417                      | 55                                | 6                 |
|               | 5' CTCCAGCTTGTTTCTCCATC 3'      |                          |                                   |                   |
|               | 5' GCTGTCTGTGATCGGAACACTG 3'    | 509                      | 62                                | 7                 |
|               | 5' GTCTCCGACAGCTGGTATGTTG 3'    |                          |                                   |                   |
| <i>Pax7</i>   | 5' CTGGATGAGGGCTCAGATGT 3'      | 243                      | 52                                | 6                 |
|               | 5' GGTTAGCTCCTGCCTGCTTA 3'      |                          |                                   |                   |
|               | 5' CAAGAGGTTTATCCAGCCGAC 3'     | 498                      | 57                                | 7                 |
|               | 5' GAGGGCACCGTGCTTCGGTC 3'      |                          |                                   |                   |
| <i>MyoD</i>   | 5' ACATAGACTTGACAGGCCCCGA 3'    | 450                      | 52                                | 8                 |
|               | 5' AGACCTTCGATGTAGCGGATGG 3'    |                          |                                   |                   |
|               | 5' GCCCGCGCTCCAAGTCTCTGAT 3'    | 397                      | 59                                | 9                 |
|               | 5' CCTACGGTGGTGCGCCCTCTGC 3'    |                          |                                   |                   |
| <i>Myf-5</i>  | 5' GAGCCAAGAGTAGCAGCCTTCG 3'    | 440                      | 54                                | 8                 |
|               | 5' GTTCTTTCGGGACCAGACAGGG 3'    |                          |                                   |                   |
|               | 5' TGCCATCCGCTACATTGAGAG 3'     | 353                      | 59                                | 9                 |
|               | 5' CCGGGTAGCAGGCTGTGAGTTG 3'    |                          |                                   |                   |
| <i>Myog</i>   | 5' CCATCCAGTACATTGAGCGCCTA 3'   | 550                      | 55                                | 8                 |
|               | 5' GGGGCTCTCTGGACTCCATCTT 3'    |                          |                                   |                   |
|               | 5' GGGCCCCTGGAAGAAAAG 3'        | 364                      | 55                                | 9                 |
|               | 5' AGGAGGCGCTGTGGGAGTT 3'       |                          |                                   |                   |
| <i>Mrf4</i>   | 5' CTGCGCGAAAGGAGGAGACTAAAG 3'  | 367                      | 55                                | 10                |
|               | 5' ATGGAAGAAAGGCGCTGAAGACTG 3'  |                          |                                   |                   |
|               | 5' CTACATTGAGCGTCTACAGGACC 3'   | 234                      | 55                                | 11                |
|               | 5' CTGAAGACTGCTGGAGGCTG 3'      |                          |                                   |                   |
| <i>Ncam</i>   | 5' TGTC AAGTGGCAGGAGATGC 3'     | 137                      | 52                                | 12                |
|               | 5' GCGGTTGTAGATGGTGAGGGT 3'     |                          |                                   |                   |
| <i>Vcam-1</i> | 5' AACTCTTACCTGTGCGCTGT 3'      | 304                      | 57                                | 13                |
|               | 5' ATTTCCCGGTATCTTCAATGG 3'     |                          |                                   |                   |
| <i>Itga3</i>  | 5' AAGCCAAATCTGAGACTGTG 3'      | 660                      | 47                                | 14                |
|               | 5' GTAGTATCGGTCCCAATCT 3'       |                          |                                   |                   |
| <i>Itgb1</i>  | 5' TGTGGAGACTCCAGACTGTCCTACT 3' | 247                      | 57                                | 14                |
|               | 5' TCATTTCCCTCATACTCGGATT 3'    |                          |                                   |                   |
| <i>Mcad</i>   | 5' CCACAAACGCCTCCCCTACCCACTT 3' | 446                      | 58                                | 10                |
|               | 5' TCGTCGATGCTGAAGAACTCAGGGC 3' |                          |                                   |                   |
| <i>Adam12</i> | 5' CACGAATCGCTGCTGTAACGCTA 3'   | 396                      | 49                                | 15                |
|               | 5' CTCTCAGCTCACATTTGGCGAAGGC 3' |                          |                                   |                   |
| <i>Cd9</i>    | 5' GAGCATGCCGGTCAAAGGAGGTAG 3'  | 685                      | 58                                | 16                |
|               | 5' TCAGCACATTTCTCGGCTCC 3'      |                          |                                   |                   |
| <i>Cd81</i>   | 5' AGTACACGGAGCTGTTCCGG 3'      | 304                      | 52                                | 17                |
|               | 5' ATGGGAGTGGAGGGCTGCAC 3'      |                          |                                   |                   |
| <i>GAPDH</i>  | 5' ACTCCACTCACGGCAAATTC 3'      | 385                      | 59                                | 7]                |
|               | 5' ACTGTGGTCATGAGCCCTTC 3'      |                          |                                   |                   |

## Supplementary References

1. Sebastiano V, L Gentile, S Garagna, CA Redi and M Zuccotti. (2005). Cloned pre-implantation mouse embryos show correct timing but altered levels of gene expression. *Mol Reprod Dev* 70:146–154.
2. Toyooka Y, N Tsunekawa, R Akasu and T Noce. (2003). Embryonic stem cells can form germ cells *in vitro*. *Proc Natl Acad Sci U S A* 100:11457–11462.
3. Furusawa T, K Ohkoshi, C Honda, S Takahashi and T Tokunaga. (2004). Embryonic stem cells expressing both platelet endothelial cell adhesion molecule-1 and stage-specific embryonic antigen-1 differentiate predominantly into epiblast cells in a chimeric embryo. *Biol Reprod* 70:1452–1457.
4. Takahashi K and S Yamanaka. (2006). Induction of pluripotent stem cells from mouse embryonic and adult fibroblast cultures by defined factors. *Cell* 126:663–676.
5. Buehr M, S Meek, K Blair, J Yang, J Ure, J Silva, R McLay, J Hall, QL Ying and A Smith. (2008). Capture of authentic embryonic stem cells from rat blastocysts. *Cell* 135:1287–1298.
6. Holterman CE, F Le Grand, S Kuang, P Seale and MA Rudnicki. (2007). *Megf10* regulates the progression of the satellite cell myogenic program. *J Cell Biol* 179:911–922.
7. Lepper C, SJ Conway and CM Fan. (2009). Adult satellite cells and embryonic muscle progenitors have distinct genetic requirements. *Nature* 460:627–631.
8. De Bari C, F Dell’Accio, F Vandenabeele, JR Vermeesch, JM Raymackers and FP Luyten. (2003). Skeletal muscle repair by adult human mesenchymal stem cells from synovial membrane. *J Cell Biol* 160:909–918.
9. Cornelison DD, BB Olwin, MA Rudnicki and BJ Wold. (2000). *MyoD*(*-/-*) satellite cells in single-fiber culture are differentiation defective and *MRF4* deficient. *Dev Biol* 224:122–137.
10. Cornelison DD and BJ Wold. (1997). Single-cell analysis of regulatory gene expression in quiescent and activated mouse skeletal muscle satellite cells. *Dev Biol* 191:270–283.
11. Patapoutian A, JK Yoon, JH Miner, S Wang, K Stark and B Wold. (1995). Disruption of the mouse *MRF4* gene identifies multiple waves of myogenesis in the myotome. *Development* 121:3347–3358.
12. Yoong LF, ZN Peng, G Wan and HP Too. (2005). Tissue expression of alternatively spliced *GFRalpha1*, *NCAM* and *RET* isoforms and the distinct functional consequence of ligand-induced activation of *GFRalpha1* isoforms. *Brain Res Mol Brain Res* 139:1–12.
13. Zerfaoui M, Y Suzuki, AS Naura, CP Hans, C Nichol and AH Boulares. (2008). Nuclear translocation of p65 NF-kappaB is sufficient for *VCAM-1*, but not *ICAM-1*, expression in TNF-stimulated smooth muscle cells: Differential requirement for *PARP-1* expression and interaction. *Cell Signal* 20:186–194.
14. Maitra N, IL Flink, JJ Bahl and E Morkin. (2000). Expression of alpha and beta integrins during terminal differentiation of cardiomyocytes. *Cardiovasc Res* 47:715–725.
15. Abe E, H Mocharla, T Yamate, Y Taguchi and SC Manolagas. (1999). *Meltrin-alpha*, a fusion protein involved in multinucleated giant cell and osteoclast formation. *Calcif Tissue Int* 64:508–515.
16. Takemura T, S Hino, Y Murata, H Yanagida, M Okada, K Yoshioka and RD Harris. (1999). Coexpression of *CD9* augments the ability of membrane-bound heparin-binding epidermal growth factor-like growth factor (*proHB-EGF*) to preserve renal epithelial cell viability. *Kidney Int* 55:71–81.
17. Clark KL, Z Zeng, AL Langford, SM Bowen and SC Todd. (2001). *PGRL* is a major *CD81*-associated protein on lymphocytes and distinguishes a new family of cell surface proteins. *J Immunol* 167:5115–5121.
